# Supplementary material
Source: PubMed Central journal article supplement (PMC5907800)
Supplement: NIHMS900687-supplement-Supplemental_Figure_1.pdf [file NIHMS900687-supplement-Supplemental_Figure_1.pdf]

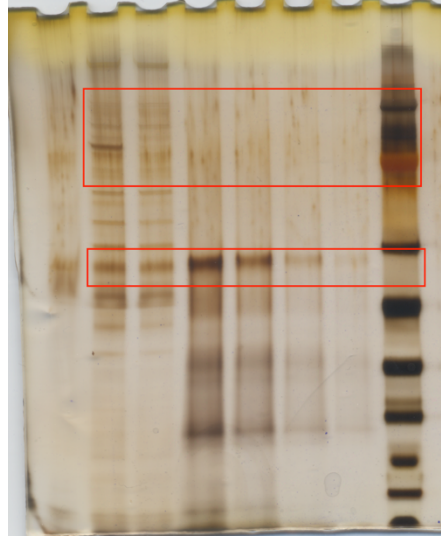

**Supplemental Figure 1. Silver stain protein gel of collected supernatant from Sema2b expression in S2 cells.** Image of entire gel referenced in Extended Data Figure 3 panel b. Red boxes delineate regions highlighted in the Extended Data figure.
